# Supplementary material for: Use of optical tweezers technology for long-term, focal stimulation of specific subcellular neuronal compartments
Source: Royal Society of Chemistry journal article supplement (doi:10.1039/c0ib00102c), 2011-01-01
Supplement: c0ib00102c.pdf [file c0ib00102c.pdf]

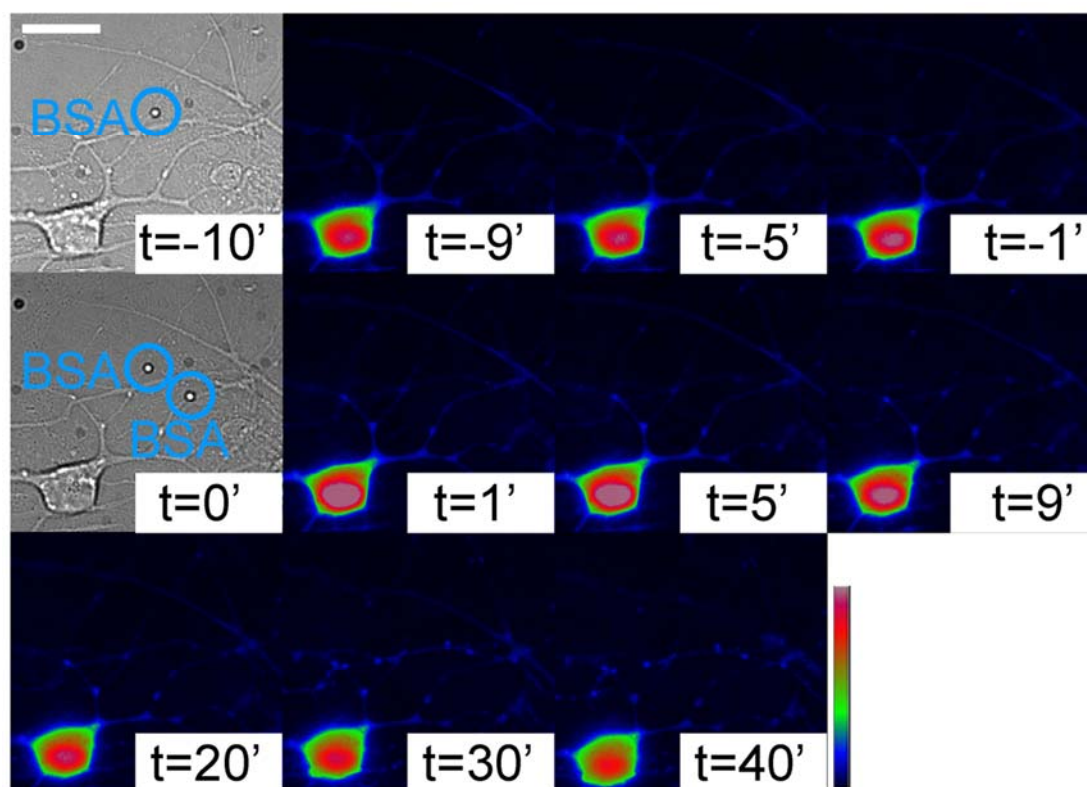

#### **Focal stimulation with two BSA-coated beads.**

Similar to Figure 5 except that two BSA beads were placed instead of a BSA-  
followed by BDNF-bead. Calcium levels, represented in false colors, remain almost  
constant showing non-activation of the TrkB receptor. Scale bar 15 $\mu$ m.
